# Supplementary material for: Gene Expression Profiling of Mono- and Co-Culture Models of the Respiratory Tract Exposed to Crystalline Quartz under Submerged and Air-Liquid Interface Conditions
Source: MDPI journal article supplement (doi:10.3390/ijms23147773), 2022-07-14
Supplement: s1 [file s1]

## Supplementary information to:

# Gene expression profiling of mono- and co-culture models of the respiratory tract exposed to crystalline quartz under submerged and air-liquid interface conditions

Alexandra Friesen<sup>1,†</sup>, Susanne Fritsch-Decker<sup>2,†</sup>, Matthias Hufnagel<sup>1</sup>, Sonja Mülhopt<sup>3</sup>, Dieter Stapf<sup>3</sup>, Carsten Weiss<sup>2,\*</sup> and Andrea Hartwig<sup>1,\*</sup>

<sup>1</sup> Department of Food Chemistry and Toxicology, Institute of Applied Biosciences (IAB), Karlsruhe Institute of Technology (KIT), 76131 Karlsruhe, Germany; alexandra.friesen@kit.edu (A.F.); matthias.hufnagel@gmail.com (M.H.)

<sup>2</sup> Institute of Biological and Chemical Systems, Biological Information Processing, Karlsruhe Institute of Technology (KIT), 76344 Eggenstein-Leopoldshafen, Germany; susanne.fritsch-decker@kit.edu

<sup>3</sup> Institute of Biological and Chemical Systems, Biological Information Processing, Karlsruhe Institute of Technology (KIT), 76344 Eggenstein-Leopoldshafen, Germany; sonja.muelhopt@kit.edu (S.M.); dieter.stapf@kit.edu (D.S.)

\* Correspondence: andrea.hartwig@kit.edu (A.H.); carsten.weiss@kit.edu (C.W.)

† These authors contributed equally to this work.

**Supplementary Table S1: log2-fold changes of all genes in the applied gene set after exposure of A549 and dTHP-1 mono-cultures to Min-U-Sil5 and 24 hours post-incubation.** A549 ALI cultures were exposed to  $15.8 \pm 0.8$  (low),  $29.1 \pm 2.4$  (mid), and  $59.4 \pm 2.0$   $\mu\text{g}/\text{cm}^2$  (high), A549 submerged cultures to 15 (low), 30 (mid) and 60  $\mu\text{g}/\text{cm}^2$  (high) and dTHP-1 submerged cultures to 1.5 (low), 3 (mid), and 6  $\mu\text{g}/\text{cm}^2$  (high) Min-U-Sil5. The means of at least three independent experiments are displayed.

|                | log2-fold change   |       |       |                          |       |       |                  |       |       |
|----------------|--------------------|-------|-------|--------------------------|-------|-------|------------------|-------|-------|
|                | A549 ALI<br>(dose) |       |       | A549 submerged<br>(dose) |       |       | dTHP-1<br>(dose) |       |       |
|                | low                | mid   | high  | low                      | mid   | high  | low              | mid   | high  |
| <i>AHR</i>     | -0,12              | 0,20  | 0,13  | -0,07                    | -0,14 | -0,20 | 0,16             | 0,01  | 0,08  |
| <i>CYP1A1</i>  | -0,33              | 0,14  | -0,51 | 0,17                     | 0,55  | 0,30  | 1,09             | 1,31  | 2,03  |
| <i>NQO1</i>    | 0,02               | -0,05 | 0,09  | -0,02                    | -0,02 | 0,09  | 0,17             | 0,38  | 0,62  |
| <i>CCL22</i>   | 0,81               | 0,01  | -0,48 | 0,26                     | -0,20 | 1,24  | 0,07             | 0,09  | 0,26  |
| <i>COX2</i>    | -0,13              | 0,04  | 0,28  | 0,17                     | 0,26  | 0,41  | 0,15             | 0,15  | 0,64  |
| <i>IL-1A</i>   | -0,31              | 0,17  | 0,60  | -0,15                    | -0,50 | 0,35  | 0,10             | 0,34  | 0,76  |
| <i>IL-1B</i>   | 0,04               | -0,62 | -0,86 | 0,23                     | 0,47  | 0,52  | 0,15             | 0,46  | 0,97  |
| <i>IL-6</i>    | -                  | -     | 0,13  | -1,00                    | 0,30  | 1,46  | -0,29            | 0,74  | 0,28  |
| <i>IL-8</i>    | 0,13               | 0,26  | 0,45  | 0,29                     | 1,18  | 2,46  | 1,69             | 3,00  | 4,58  |
| <i>TNF-A</i>   | -                  | -     | -     | -                        | -     | -     | 0,04             | 0,10  | 0,35  |
| <i>ACTA2</i>   | -0,11              | -0,05 | -0,06 | 0,05                     | -0,11 | -0,35 | -0,34            | -0,13 | 0,08  |
| <i>COL1A1</i>  | -0,58              | -0,12 | -1,48 | -0,22                    | -0,02 | 0,03  | 0,06             | 0,21  | 0,08  |
| <i>CTNNA1</i>  | -0,16              | -0,11 | 0,24  | 0,17                     | 0,10  | 0,06  | 0,16             | 0,09  | 0,13  |
| <i>FN1</i>     | 0,03               | 0,20  | 0,17  | -0,16                    | -0,41 | -0,89 | -0,14            | -0,13 | -0,40 |
| <i>OPN</i>     | 0,12               | -0,13 | 0,13  | 0,17                     | 0,20  | 0,43  | -0,06            | -0,08 | -0,24 |
| <i>PDGFA</i>   | -0,15              | 0,02  | 0,19  | 0,02                     | 0,05  | 0,12  | 0,03             | 0,00  | -0,20 |
| <i>TGFB</i>    | -                  | -     | -0,28 | -0,08                    | 0,08  | 0,09  | 0,10             | -0,07 | -0,20 |
| <i>TIMP1</i>   | -0,04              | 0,20  | 0,15  | -0,01                    | -0,03 | 0,02  | -0,21            | -0,08 | -0,14 |
| <i>VIM</i>     | 0,03               | 0,29  | 0,04  | -0,19                    | -0,13 | -0,15 | -0,11            | -0,38 | -0,33 |
| <i>FTL1</i>    | -0,19              | 0,62  | 0,21  | 0,53                     | 0,08  | -1,02 | -0,10            | -0,67 | 0,09  |
| <i>MT1X</i>    | 0,01               | 0,06  | 0,01  | -0,06                    | 0,28  | 0,51  | -0,07            | -0,08 | 0,14  |
| <i>MT2A</i>    | -0,03              | 0,28  | 0,02  | 0,22                     | 0,28  | 0,40  | -0,08            | -0,18 | 0,37  |
| <i>SLC30A1</i> | -0,11              | 0,00  | 0,08  | 0,07                     | 0,00  | -0,02 | 0,04             | -0,19 | -0,30 |
| <i>TFRC</i>    | -0,13              | 0,04  | 0,25  | 0,14                     | 0,09  | 0,19  | 0,19             | 0,24  | 0,48  |
| <i>CAT</i>     | 0,06               | 0,04  | -0,02 | -0,13                    | -0,12 | -0,13 | 0,03             | 0,01  | -0,15 |
| <i>G6PD</i>    | -0,12              | -0,10 | 0,12  | 0,11                     | -0,01 | -0,15 | 0,08             | 0,09  | 0,15  |
| <i>GCLC</i>    | 0,03               | 0,07  | 0,15  | -0,02                    | -0,19 | -0,25 | 0,09             | -0,02 | -0,22 |
| <i>GPX1</i>    | 0,07               | 0,07  | -0,10 | 0,06                     | 0,18  | 0,13  | 0,03             | 0,10  | 0,19  |
| <i>GPX2</i>    | -0,01              | 0,06  | 0,09  | -0,19                    | -0,36 | -0,43 | -                | -     | -     |
| <i>GSR</i>     | -0,01              | -0,12 | 0,14  | 0,12                     | 0,08  | 0,14  | 0,21             | 0,36  | 0,44  |
| <i>HMOX1</i>   | 0,02               | 0,07  | 0,30  | 0,18                     | 0,21  | 0,23  | -0,02            | 0,19  | 0,28  |
| <i>HSPA1A</i>  | 0,09               | 0,20  | 0,26  | 0,08                     | 0,22  | 0,17  | 0,05             | 0,05  | 0,20  |
| <i>KEAP1</i>   | -0,18              | -0,11 | -0,03 | 0,03                     | -0,10 | -0,24 | 0,12             | 0,19  | 0,04  |
| <i>MAP3K5</i>  | -0,17              | 0,12  | 0,09  | 0,04                     | -0,06 | -0,03 | 0,02             | -0,10 | -0,26 |
| <i>NFE2L2</i>  | 0,03               | 0,20  | 0,18  | -0,02                    | -0,03 | -0,02 | 0,19             | 0,16  | 0,25  |
| <i>NFKB1</i>   | -0,09              | -0,06 | 0,05  | 0,03                     | 0,18  | 0,30  | 0,32             | 0,54  | 0,85  |
| <i>NFKB2</i>   | -0,28              | -0,07 | 0,11  | 0,48                     | 0,80  | 1,18  | 0,40             | 0,79  | 1,25  |
| <i>NFKBIA</i>  | -0,21              | 0,24  | 0,09  | 0,30                     | 0,44  | -0,04 | 0,31             | 0,25  | 0,78  |
| <i>PRDX1</i>   | 0,03               | 0,22  | 0,04  | -0,04                    | 0,03  | 0,19  | -0,01            | 0,22  | 0,46  |
| <i>SOD1</i>    | 0,27               | -0,40 | 0,09  | -0,01                    | -0,07 | 0,03  | -0,12            | -0,11 | -0,11 |

|                  |       |       |       |       |       |       |       |       |       |
|------------------|-------|-------|-------|-------|-------|-------|-------|-------|-------|
| <i>SOD2</i>      | 0,11  | 0,15  | 0,40  | 0,37  | 0,68  | 1,29  | 0,50  | 0,96  | 1,92  |
| <i>TXN</i>       | 0,19  | 0,27  | -0,01 | -0,04 | 0,16  | 0,31  | 0,08  | 0,02  | 0,28  |
| <i>TXNRD1</i>    | -0,02 | 0,02  | 0,22  | 0,07  | 0,01  | 0,09  | 0,32  | 0,56  | 0,81  |
| <i>APAF1</i>     | -0,25 | -0,08 | 0,11  | 0,00  | 0,08  | -0,21 | 0,11  | 0,05  | -0,18 |
| <i>BAX</i>       | 0,00  | -0,10 | 0,09  | 0,13  | 0,17  | 0,18  | 0,02  | 0,25  | 0,33  |
| <i>BBC3</i>      | -0,02 | -0,39 | -0,57 | 0,47  | 0,02  | 0,05  | 0,14  | 0,16  | 0,15  |
| <i>BCL2</i>      | -0,11 | -0,08 | 0,10  | 0,24  | 0,28  | 0,19  | 0,28  | 0,36  | 0,38  |
| <i>BTRC</i>      | -0,06 | 0,02  | 0,07  | 0,05  | -0,10 | -0,21 | 0,07  | 0,03  | 0,00  |
| <i>CCND1</i>     | -0,03 | -0,09 | 0,23  | -0,06 | -0,07 | 0,07  | 0,19  | 0,25  | 0,51  |
| <i>CDKN1A</i>    | -0,13 | 0,00  | 0,17  | 0,13  | 0,18  | 0,37  | 0,11  | 0,20  | 0,12  |
| <i>CDKN1B</i>    | -0,05 | -0,01 | 0,15  | 0,03  | 0,02  | -0,07 | 0,03  | -0,04 | -0,23 |
| <i>CDKN2B</i>    | -     | -     | -     | -     | -     | -     | -     | -     | -     |
| <i>E2F1</i>      | -0,05 | -0,02 | 0,16  | 0,00  | 0,11  | 0,17  | 0,15  | 0,23  | 0,40  |
| <i>EGFR</i>      | -0,11 | -0,12 | 0,08  | 0,17  | 0,28  | 0,24  | -0,12 | 0,09  | 0,94  |
| <i>JUN</i>       | -0,23 | -0,07 | 0,28  | 0,10  | 0,32  | 0,40  | 0,33  | 0,61  | 0,86  |
| <i>MDM2</i>      | -0,05 | -0,02 | 0,06  | -0,03 | -0,06 | -0,08 | 0,14  | 0,11  | 0,15  |
| <i>MYC</i>       | -0,06 | 0,12  | 0,30  | 0,14  | 0,01  | -0,06 | 0,21  | 0,06  | 0,11  |
| <i>PLK3</i>      | 0,06  | 0,14  | 0,17  | 0,07  | 0,16  | -0,14 | 0,15  | 0,31  | 0,54  |
| <i>PMAIP1</i>    | -0,07 | 0,15  | 0,16  | 0,02  | 0,11  | 0,27  | 0,11  | 0,20  | 0,38  |
| <i>PPM1D</i>     | -0,08 | -0,07 | -0,02 | -0,08 | 0,07  | 0,02  | 0,13  | 0,07  | -0,03 |
| <i>SIRT2</i>     | 0,02  | 0,04  | 0,14  | 0,28  | 0,45  | 0,41  | 0,01  | 0,19  | 0,02  |
| <i>TNFRSF10B</i> | -0,06 | -0,04 | 0,21  | 0,10  | 0,27  | 0,31  | 0,18  | 0,43  | 0,43  |
| <i>VEGFA</i>     | -0,01 | 0,33  | 0,36  | 0,33  | 0,32  | -0,48 | 0,61  | 0,55  | 1,40  |
| <i>XIAP</i>      | -0,18 | -0,05 | 0,11  | 0,06  | -0,08 | -0,16 | 0,18  | 0,18  | 0,16  |
| <i>APEX1</i>     | 0,00  | 0,13  | -0,04 | -0,09 | -0,17 | -0,22 | -0,06 | 0,02  | -0,12 |
| <i>ATM</i>       | -0,05 | -0,06 | 0,03  | -0,10 | -0,14 | -0,26 | 0,05  | -0,06 | -0,38 |
| <i>ATR</i>       | -0,04 | 0,24  | 0,00  | -0,12 | -0,05 | -0,07 | -0,11 | -0,10 | -0,03 |
| <i>BRCA1</i>     | -0,07 | 0,11  | 0,04  | -0,18 | -0,05 | -0,07 | 0,13  | 0,06  | 0,17  |
| <i>BRCA2</i>     | -0,12 | 0,12  | 0,00  | -0,01 | 0,09  | 0,06  | 0,16  | 0,13  | 0,28  |
| <i>DDB1</i>      | -0,13 | -0,07 | 0,05  | 0,03  | 0,01  | 0,03  | 0,18  | 0,43  | 0,41  |
| <i>DDB2</i>      | 0,05  | -0,02 | -0,17 | -0,22 | -0,12 | -0,13 | 0,14  | 0,32  | 0,33  |
| <i>DDIT3</i>     | 0,42  | 0,78  | 1,07  | 0,76  | 0,87  | 0,21  | 0,28  | 0,25  | 1,00  |
| <i>ERCC1</i>     | 0,08  | 0,13  | 0,02  | -0,15 | -0,01 | 0,06  | -0,05 | -0,10 | -0,24 |
| <i>ERCC4/XPF</i> | -0,02 | -0,03 | 0,11  | -0,03 | 0,02  | 0,02  | 0,10  | 0,06  | -0,01 |
| <i>ERCC5/XPG</i> | -0,07 | -0,03 | -0,04 | -0,11 | -0,16 | -0,32 | 0,11  | 0,08  | -0,10 |
| <i>GADD45A</i>   | -0,03 | 0,08  | 0,00  | -0,10 | 0,22  | 0,39  | 0,42  | 0,37  | 0,48  |
| <i>LIG1</i>      | -0,14 | 0,05  | -0,07 | 0,02  | 0,02  | -0,09 | 0,03  | 0,18  | 0,34  |
| <i>LIG3</i>      | -0,10 | -0,10 | 0,07  | 0,02  | -0,05 | -0,18 | 0,16  | 0,26  | -0,09 |
| <i>MGMT</i>      | -0,01 | 0,26  | -0,02 | 0,01  | 0,07  | -0,04 | -0,02 | 0,04  | 0,01  |
| <i>MLH1</i>      | -0,06 | -0,01 | 0,01  | -0,05 | -0,10 | -0,10 | 0,14  | 0,24  | 0,22  |
| <i>MSH2</i>      | 0,03  | 0,25  | 0,03  | -0,15 | -0,17 | -0,14 | -0,03 | 0,03  | 0,15  |
| <i>PARP1</i>     | -0,07 | -0,01 | 0,05  | -0,08 | -0,10 | -0,22 | 0,16  | 0,19  | 0,08  |
| <i>PCNA</i>      | 0,12  | 0,25  | 0,07  | -0,11 | 0,02  | 0,16  | 0,14  | 0,19  | 0,33  |
| <i>POLB</i>      | 0,02  | 0,10  | -0,27 | 0,09  | 0,19  | -0,16 | 0,15  | 0,05  | 0,00  |
| <i>POLQ</i>      | -0,24 | -0,12 | -0,07 | 0,00  | 0,22  | 0,31  | -0,02 | 0,00  | -0,06 |
| <i>RAD50</i>     | -0,04 | 0,07  | 0,07  | 0,00  | 0,01  | 0,02  | 0,06  | 0,13  | 0,00  |
| <i>RAD51</i>     | 0,06  | 0,17  | 0,04  | -0,08 | -0,01 | 0,05  | 0,12  | 0,29  | 0,43  |
| <i>RRM2B</i>     | -0,16 | -0,01 | 0,14  | 0,02  | -0,02 | -0,04 | 0,08  | -0,01 | -0,24 |
| <i>XPA</i>       | 0,11  | 0,14  | -0,01 | -0,17 | -0,13 | -0,17 | 0,04  | -0,04 | -0,09 |
| <i>XPC</i>       | -0,14 | -0,04 | 0,00  | 0,03  | -0,11 | -0,19 | 0,09  | 0,12  | -0,09 |

**Supplementary Table S2: log2-fold changes of all genes in the applied gene set after exposure of A549/dTHP-1 co-cultures to Min-U-Sil5 and 24 hours or 1, 3, and 6 hours post-incubation.** ALI co-cultures were exposed to  $15.9 \pm 0.6$  (low),  $32.2 \pm 2.9$  (mid), and  $55.9 \pm 2.9$   $\mu\text{g}/\text{cm}^2$  (high), submerged co-cultures to 15 (low), 30 (mid) and 60  $\mu\text{g}/\text{cm}^2$  (high) and time-dependent co-cultures to  $56.9 \pm 2.94$   $\mu\text{g}/\text{cm}^2$  (high) Min-U-Sil5. The means of at least three independent experiments are displayed.

|                | log2-fold change          |       |       |                                 |       |       |                           |       |       |
|----------------|---------------------------|-------|-------|---------------------------------|-------|-------|---------------------------|-------|-------|
|                | A549/dTHP-1 ALI<br>(dose) |       |       | A549/dTHP-1<br>submerged (dose) |       |       | A549/dTHP-1 ALI<br>(time) |       |       |
|                | low                       | mid   | high  | low                             | mid   | high  | 1h                        | 3h    | 6h    |
| <i>AHR</i>     | -0,04                     | -0,04 | -0,15 | -0,17                           | -0,13 | -0,03 | -0,23                     | 0,04  | 0,08  |
| <i>CYP1A1</i>  | -1,18                     | -0,10 | -0,04 | 0,06                            | 0,34  | 0,74  | 0,13                      | -0,19 | -0,48 |
| <i>NQO1</i>    | -0,12                     | -0,14 | -0,31 | 0,05                            | -0,11 | -0,39 | 0,03                      | -0,12 | -0,18 |
| <i>CCL22</i>   | 1,14                      | 1,18  | 1,65  | 0,39                            | 0,66  | -0,16 | -0,88                     | 0,46  | 0,88  |
| <i>COX2</i>    | 0,18                      | 0,42  | 1,26  | 0,54                            | 1,27  | 1,51  | -0,58                     | 1,47  | 1,94  |
| <i>IL-1A</i>   | 1,82                      | 0,23  | 2,50  | 0,79                            | 1,49  | 2,43  | -0,43                     | 4,97  | 6,96  |
| <i>IL-1B</i>   | 1,15                      | 0,70  | 1,11  | 0,99                            | 1,32  | 2,64  | 1,00                      | 3,69  | 5,23  |
| <i>IL-6</i>    | 0,82                      | 1,49  | 3,21  | 2,24                            | 2,26  | 2,47  | -0,31                     | 3,61  | 4,58  |
| <i>IL-8</i>    | 0,44                      | 1,09  | 2,75  | 1,82                            | 1,78  | 3,92  | -0,35                     | 2,65  | 3,33  |
| <i>TNF-A</i>   | 0,38                      | 0,66  | 1,26  | 0,68                            | -0,18 | 0,47  | 1,80                      | 3,02  | 2,62  |
| <i>ACTA2</i>   | -0,09                     | -0,37 | -0,26 | 0,21                            | -0,12 | -0,25 | -0,04                     | -0,07 | -0,17 |
| <i>COL1A1</i>  | -0,34                     | 0,24  | 0,10  | 0,21                            | -0,22 | 0,92  | -0,31                     | 0,11  | -0,95 |
| <i>CTNNB1</i>  | -0,01                     | -0,24 | 0,17  | 0,22                            | 0,22  | 0,48  | -0,01                     | -0,24 | 0,22  |
| <i>FN1</i>     | 0,02                      | -0,32 | -0,36 | -0,08                           | -0,08 | -0,14 | -0,56                     | -0,07 | 0,09  |
| <i>OPN</i>     | 0,26                      | 0,18  | -0,16 | -0,18                           | 0,16  | 0,10  | -0,70                     | 0,44  | 0,17  |
| <i>PDGFA</i>   | 0,02                      | -0,05 | -0,09 | 0,36                            | 0,14  | 0,42  | 0,08                      | -0,48 | -0,56 |
| <i>TGFB</i>    | 0,13                      | -0,02 | 0,30  | 0,20                            | 0,18  | 0,20  | -0,11                     | -0,04 | 0,19  |
| <i>TIMP1</i>   | 0,05                      | 0,17  | 0,17  | 0,02                            | -0,06 | 0,04  | 0,14                      | 0,51  | 0,10  |
| <i>VIM</i>     | -0,08                     | 0,05  | -0,20 | -0,08                           | -0,24 | -0,31 | 0,25                      | 0,31  | 0,00  |
| <i>FTH1</i>    | 0,23                      | 0,42  | 0,47  | 0,21                            | 0,11  | 1,01  | 0,73                      | -1,14 | -0,35 |
| <i>MT1X</i>    | -0,05                     | 0,10  | 0,42  | 0,43                            | 0,78  | 1,10  | -0,39                     | 0,47  | 0,23  |
| <i>MT2A</i>    | 0,06                      | 0,31  | 0,53  | 0,19                            | 0,23  | 1,11  | 0,07                      | 0,19  | 0,19  |
| <i>SLC30A1</i> | 0,06                      | -0,03 | 0,14  | 0,17                            | 0,10  | 0,22  | -0,19                     | -0,45 | -0,14 |
| <i>TFRC</i>    | 0,15                      | -0,08 | -0,03 | 0,15                            | 0,15  | 0,58  | -0,19                     | -0,56 | 0,16  |
| <i>CAT</i>     | 0,00                      | -0,10 | -0,14 | 0,01                            | -0,16 | -0,20 | -0,03                     | 0,00  | -0,25 |
| <i>G6PD</i>    | 0,02                      | -0,20 | -0,10 | 0,06                            | -0,26 | -0,26 | 0,17                      | -0,22 | -0,20 |
| <i>GCLC</i>    | -0,05                     | -0,22 | -0,23 | -0,07                           | -0,31 | -0,22 | -0,07                     | -0,12 | 0,06  |
| <i>GPX1</i>    | 0,06                      | 0,01  | -0,21 | -0,07                           | -0,05 | -0,24 | 0,04                      | -0,08 | -0,03 |
| <i>GPX2</i>    | -0,03                     | 0,04  | -0,25 | -0,31                           | -0,22 | -0,84 | -0,15                     | 0,37  | -0,07 |
| <i>GSR</i>     | -0,05                     | -0,15 | 0,02  | 0,06                            | 0,00  | 0,18  | -0,11                     | -0,38 | -0,22 |
| <i>HMOX1</i>   | 0,05                      | -0,05 | -0,06 | 0,06                            | -0,05 | 0,03  | 0,21                      | -0,42 | -0,41 |
| <i>HSPA1A</i>  | -0,09                     | 0,10  | 0,09  | 0,11                            | 0,01  | 0,07  | 0,07                      | -0,04 | 0,02  |
| <i>KEAP1</i>   | -0,04                     | -0,24 | -0,06 | 0,11                            | -0,21 | -0,28 | 0,28                      | -0,64 | -0,12 |
| <i>MAP3K5</i>  | 0,20                      | 0,18  | 0,20  | 0,02                            | -0,04 | 0,26  | 0,05                      | -0,03 | -0,11 |
| <i>NFE2L2</i>  | 0,03                      | 0,07  | 0,10  | 0,13                            | 0,12  | 0,36  | -0,20                     | 0,38  | 0,21  |
| <i>NFKB1</i>   | -0,01                     | -0,06 | 0,28  | 0,31                            | 0,26  | 0,67  | -0,07                     | -0,02 | 1,15  |
| <i>NFKB2</i>   | 0,03                      | 0,15  | 0,66  | 0,87                            | 0,72  | 1,51  | 0,11                      | -0,32 | 1,09  |
| <i>NFKBIA</i>  | -0,06                     | 0,01  | 0,88  | 0,76                            | 0,67  | 1,57  | 0,34                      | 1,75  | 0,92  |
| <i>PRDX1</i>   | 0,00                      | 0,18  | 0,25  | -0,03                           | -0,02 | 0,01  | 0,13                      | 0,42  | -0,17 |
| <i>SOD1</i>    | -0,79                     | 0,01  | -0,08 | 0,08                            | -0,87 | 0,37  | 0,10                      | 0,34  | -0,03 |
| <i>SOD2</i>    | 0,64                      | 1,32  | 2,28  | 1,42                            | 1,88  | 3,29  | -0,42                     | 0,98  | 2,07  |

|           |       |       |       |       |       |       |       |       |       |
|-----------|-------|-------|-------|-------|-------|-------|-------|-------|-------|
| TXN       | 0,10  | 0,29  | 0,46  | 0,18  | 0,29  | 0,30  | 0,06  | 0,57  | -0,09 |
| TXNRD1    | 0,03  | 0,02  | 0,28  | -0,04 | -0,12 | 0,39  | -0,16 | 0,12  | 0,19  |
| APAF1     | -0,05 | -0,36 | -0,05 | 0,15  | 0,03  | 0,22  | 0,03  | -0,43 | 0,05  |
| BAX       | -0,18 | -0,05 | -0,13 | 0,10  | -0,04 | -0,10 | 0,12  | -0,08 | -0,08 |
| BBC3      | -0,11 | -0,67 | -0,81 | 0,22  | -0,25 | -0,19 | -0,20 | -0,11 | 1,20  |
| BCL2      | -0,07 | -0,32 | -0,51 | -0,06 | -0,19 | -0,40 | -0,06 | -0,56 | -0,27 |
| BTRC      | 0,04  | -0,16 | -0,02 | 0,10  | -0,18 | -0,01 | 0,13  | -0,23 | -0,15 |
| CCND1     | -0,05 | -0,16 | 0,04  | 0,04  | -0,16 | 0,02  | -0,07 | -0,13 | 0,07  |
| CDKN1A    | -0,01 | -0,15 | 0,03  | 0,26  | 0,17  | 0,27  | 0,00  | 0,10  | 0,57  |
| CDKN1B    | 0,06  | -0,03 | 0,03  | 0,20  | 0,13  | 0,24  | 0,04  | -0,44 | -0,10 |
| CDKN2B    | -     | -     | -     | -     | -     | -     | -     | -     | -     |
| E2F1      | -0,01 | -0,25 | 0,31  | -0,13 | -0,22 | -0,14 | 0,09  | -0,19 | -0,52 |
| EGFR      | -0,05 | -0,25 | 0,30  | 0,34  | 0,41  | 0,86  | -0,10 | -0,37 | 0,41  |
| JUN       | -0,02 | -0,25 | 0,34  | 0,51  | 0,03  | 0,49  | 0,38  | 0,05  | 0,25  |
| MDM2      | -0,09 | -0,11 | 0,21  | 0,23  | 0,13  | 0,28  | 0,05  | 0,02  | 0,02  |
| MYC       | 0,01  | -0,02 | 0,36  | 0,20  | -0,01 | 0,14  | -0,18 | -0,37 | 0,09  |
| PLK3      | 0,25  | 0,15  | 0,32  | 0,43  | 0,27  | 0,31  | 0,04  | 0,32  | 0,49  |
| PMAIP1    | 0,01  | 0,20  | 0,21  | 0,02  | 0,05  | 0,17  | -0,45 | 0,26  | 0,19  |
| PPM1D     | -0,14 | -0,24 | -0,05 | 0,07  | 0,19  | 0,02  | -0,01 | -0,16 | -0,20 |
| SIRT2     | 0,07  | -0,09 | -0,02 | 0,09  | -0,06 | 0,04  | 0,09  | -0,12 | -0,11 |
| TNFRSF10B | 0,05  | -0,07 | 0,47  | 0,24  | 0,24  | 0,81  | -0,29 | 0,05  | 0,30  |
| VEGFA     | 0,07  | 0,01  | 0,49  | 0,46  | 0,19  | 1,09  | 0,17  | -0,13 | 0,19  |
| XIAP      | -0,05 | -0,08 | -0,06 | 0,02  | -0,19 | 0,05  | 0,01  | -0,25 | 0,17  |
| APEX1     | 0,02  | 0,15  | 0,00  | 0,01  | -0,21 | -0,19 | 0,16  | 0,13  | -0,12 |
| ATM       | -0,08 | -0,20 | -0,22 | 0,08  | -0,19 | -0,05 | -0,08 | -0,16 | -0,14 |
| ATR       | -0,04 | 0,13  | 0,11  | 0,07  | -0,11 | -0,21 | 0,10  | 0,14  | -0,19 |
| BRCA1     | -0,08 | -0,12 | -0,09 | -0,07 | -0,07 | -0,07 | 0,12  | -0,09 | -0,29 |
| BRCA2     | -0,02 | 0,00  | 0,01  | -0,07 | -0,08 | -0,08 | -0,01 | -0,22 | -0,45 |
| DDB1      | -0,05 | -0,26 | 0,06  | 0,06  | -0,03 | 0,06  | 0,04  | -0,20 | -0,12 |
| DDB2      | -0,08 | -0,27 | -0,24 | -0,27 | -0,36 | -0,60 | -0,14 | -0,07 | -0,14 |
| DDIT3     | -0,14 | 0,66  | 0,99  | 0,39  | 0,33  | 0,80  | 0,11  | -0,53 | -0,42 |
| ERCC1     | -0,05 | 0,12  | 0,09  | -0,02 | 0,00  | 0,01  | -0,01 | 0,41  | 0,09  |
| ERCC4/XPF | -0,10 | 0,03  | 0,24  | 0,02  | 0,02  | 0,15  | -0,05 | -0,02 | -0,09 |
| ERCC5/XPG | -0,15 | -0,21 | -0,10 | 0,04  | -0,18 | -0,16 | -0,09 | 0,06  | -0,26 |
| GADD45A   | -0,05 | -0,02 | -0,51 | 0,04  | 0,14  | -0,32 | -0,19 | 0,24  | 0,67  |
| LIG1      | -0,03 | -0,22 | -0,18 | 0,04  | -0,26 | -0,26 | 0,24  | -0,53 | -0,45 |
| LIG3      | -0,05 | -0,31 | -0,26 | 0,10  | -0,09 | -0,11 | 0,12  | -0,35 | -0,03 |
| MGMT      | -0,03 | 0,07  | -0,07 | -0,06 | -0,17 | -0,38 | 0,18  | 0,37  | 0,00  |
| MLH1      | -0,02 | -0,09 | 0,09  | 0,00  | -0,24 | -0,15 | 0,08  | -0,09 | -0,30 |
| MSH2      | 0,01  | 0,11  | -0,06 | 0,01  | -0,16 | -0,17 | 0,17  | 0,05  | -0,25 |
| PARP1     | -0,03 | -0,13 | -0,17 | 0,01  | -0,25 | -0,16 | 0,01  | -0,32 | 0,00  |
| PCNA      | 0,12  | 0,11  | 0,35  | 0,02  | 0,11  | -0,08 | -0,28 | 0,23  | -0,06 |
| POLB      | 0,07  | -0,29 | 0,00  | 0,14  | -0,22 | -0,07 | -0,05 | -0,20 | -0,16 |
| POLQ      | -0,09 | -0,26 | 0,11  | 0,16  | 0,13  | -0,02 | 0,27  | -0,79 | -0,39 |
| RAD50     | -0,08 | 0,02  | -0,26 | 0,02  | -0,01 | 0,12  | 0,08  | -0,10 | -0,08 |
| RAD51     | 0,08  | 0,12  | 0,11  | -0,07 | -0,13 | -0,20 | 0,15  | -0,09 | -0,16 |
| RRM2B     | -0,13 | -0,25 | -0,14 | 0,07  | -0,04 | 0,13  | -0,04 | -0,34 | -0,11 |
| XPA       | -0,07 | 0,08  | -0,52 | -0,01 | -0,08 | -0,08 | -0,08 | 0,23  | 0,04  |
| XPC       | -0,02 | -0,19 | -0,07 | 0,04  | -0,23 | -0,11 | 0,11  | -0,23 | -0,23 |

**Supplementary Table S3: Complete list of genes utilized in the HT RT-qPCR with their corresponding proteins.**

| Cluster                   | Gene           | Corresponding protein                                                           |
|---------------------------|----------------|---------------------------------------------------------------------------------|
| Xenobiotic metabolism     | <i>AHR</i>     | aryl hydrocarbon receptor                                                       |
|                           | <i>CYP1A1</i>  | cytochrome P450, family 1, subfamily A, polypeptide 1 (CYP1A1)                  |
|                           | <i>NQO1</i>    | NAD(P)H dehydrogenase, quinone 1 (NQO1)                                         |
| Inflammation              | <i>CCL22</i>   | C-C motif chemokine 22 (CCL22)                                                  |
|                           | <i>COX2</i>    | prostaglandin-endoperoxide synthase 2 (PTGS2)/<br>cyclooxygenase-2 (COX-2)      |
|                           | <i>IL-1A</i>   | interleukin-1 $\alpha$ (IL-1 $\alpha$ )                                         |
|                           | <i>IL-1B</i>   | interleukin-1 $\beta$ (IL-1 $\beta$ )                                           |
|                           | <i>IL-6</i>    | interleukin-6 (IL-6)                                                            |
|                           | <i>IL-8</i>    | interleukin-8 (IL-8)                                                            |
|                           | <i>TNF-A</i>   | tumor necrosis factor $\alpha$ (TNF- $\alpha$ )                                 |
| Fibrosis                  | <i>ACTA2</i>   | alpha smooth muscle actin ( $\alpha$ -SMA)                                      |
|                           | <i>COL1A1</i>  | collagen, type I, alpha 1 (COL1A1)                                              |
|                           | <i>CTNNB1</i>  | $\beta$ -catenin (CTNNB)                                                        |
|                           | <i>FN1</i>     | fibronectin1 (FN1)                                                              |
|                           | <i>OPN</i>     | osteopontin (OPN)                                                               |
|                           | <i>PDGFA</i>   | platelet-derived growth factor subunit A (PDGF-A)                               |
|                           | <i>TGFB</i>    | transforming growth factor $\beta$ (TGF- $\beta$ )                              |
|                           | <i>TIMP1</i>   | tissue inhibitor of metalloproteinase (TIMP1)                                   |
| Metal homeostasis         | <i>VIM</i>     | vimentin (VIM)                                                                  |
|                           | <i>FTH1</i>    | ferritin, heavy polypeptide 1 (FTH1)                                            |
|                           | <i>MT1X</i>    | metallothionein 1X (MT1X)                                                       |
|                           | <i>MT2A</i>    | metallothionein 2A (MT2A)                                                       |
|                           | <i>SLC30A1</i> | solute carrier family 30 (zinc transporter), member 1 (ZnT1)                    |
| Oxidative stress response | <i>TFRC</i>    | transferrin receptor (TFR)                                                      |
|                           | <i>CAT</i>     | catalase (CAT)                                                                  |
|                           | <i>G6PD</i>    | glucose-6-phosphate dehydrogenase (G6PD)                                        |
|                           | <i>GCLC</i>    | glutamate-cysteine ligase, catalytic subunit (GCL)                              |
|                           | <i>GPX1</i>    | glutathione peroxidase 1 (GPX1)                                                 |
|                           | <i>GPX2</i>    | glutathione peroxidase 2 (GPX2)                                                 |
|                           | <i>GSR</i>     | glutathione reductase (GSR)                                                     |
|                           | <i>HMOX1</i>   | heme oxygenase (decycling) 1 (HO1)                                              |
|                           | <i>HSPA1A</i>  | heat shock 70kDa protein 1A (hsp70)                                             |
|                           | <i>KEAP1</i>   | kelch-like ECH-associated protein 1 (Keap1)                                     |
|                           | <i>MAP3K5</i>  | mitogen-activated protein kinase kinase kinase 5 (MAP3K5/ASK1)                  |
|                           | <i>NFE2L2</i>  | nuclear factor, erythroid 2-like 2 (Nrf2)                                       |
|                           | <i>NFKB1</i>   | nuclear factor of kappa light polypeptide gene enhancer in B-cells 1 (p50/p105) |

|                                     |                  |                                                                                            |
|-------------------------------------|------------------|--------------------------------------------------------------------------------------------|
|                                     | <i>NFKB2</i>     | nuclear factor of kappa light polypeptide gene enhancer in B-cells 2 (p49/p100)            |
|                                     | <i>NFKBIA</i>    | nuclear factor of kappa light polypeptide gene enhancer in B-cells inhibitor, alpha (IKBA) |
|                                     | <i>PRDX1</i>     | peroxiredoxin 1 (Prx1)                                                                     |
|                                     | <i>SOD1</i>      | superoxide dismutase 1, soluble (SOD1)                                                     |
|                                     | <i>SOD2</i>      | superoxide dismutase 2, mitochondrial (SOD2/MnSOD)                                         |
|                                     | <i>TXN</i>       | thioredoxin (Txr)                                                                          |
|                                     | <i>TXNRD1</i>    | thioredoxin reductase 1 (TxrR)                                                             |
| Apoptosis and cell cycle regulation | <i>APAF1</i>     | apoptotic protease activating factor (APAF1)                                               |
|                                     | <i>BAX</i>       | bcl2-associated x protein (bax)                                                            |
|                                     | <i>BBC3</i>      | p53 up-regulated modulator of apoptosis (PUMA)                                             |
|                                     | <i>BCL2</i>      | b-cell cll/lymphoma 2 (bcl-2)                                                              |
|                                     | <i>BTRC</i>      | transducin repeat containing E3 ubiquitin protein ligase, beta ( $\beta$ -TrCP)            |
|                                     | <i>CCND1</i>     | cyclin D1 (CCND1)                                                                          |
|                                     | <i>CDKN1A</i>    | cyclin-dependent kinase inhibitor 1A (p21)                                                 |
|                                     | <i>CDKN1B</i>    | cyclin-dependent kinase inhibitor 1B (p27)                                                 |
|                                     | <i>CDKN2B</i>    | cyclin-dependent kinase inhibitor 2B (p15)                                                 |
|                                     | <i>E2F1</i>      | E2F transcription factor 1 (E2F1)                                                          |
|                                     | <i>EGFR</i>      | epidermal growth factor receptor (EGFR)                                                    |
|                                     | <i>JUN</i>       | jun proto-oncogene (c-jun)                                                                 |
|                                     | <i>MDM2</i>      | Mouse double minute 2 hom. proto-onco-gene, E3 ubiquitin protein ligase (Mdm2)             |
|                                     | <i>MYC</i>       | v-myc avian myelocytomatosis viral oncogene homolog (c-myc)                                |
|                                     | <i>PLK3</i>      | polo-like kinase 3 (PLK3)                                                                  |
|                                     | <i>PMAIP1</i>    | phorbol-12-myristate-13-acetate-induced protein 1 (Noxa)                                   |
|                                     | <i>PPM1D</i>     | protein phosphatase, mg2+/Mn2+ dependent, 1D (PPM1D)                                       |
|                                     | <i>SIRT2</i>     | sirtuin 2 (SIRT2)                                                                          |
|                                     | <i>TNFRSF10B</i> | tumor necrosis factor receptor superfamily, member 10b (DR5)                               |
|                                     | <i>VEGFA</i>     | vascular endothelial growth factor A (VEGFA)                                               |
| DNA damage response and repair      | <i>XIAP</i>      | X-linked inhibitor of apoptosis (XIAP)                                                     |
|                                     | <i>APEX1</i>     | apurinic-apyrimidinic endonuclease 1 (APEX1/Ref-1)                                         |
|                                     | <i>ATM</i>       | ataxia telangiectasia mutated (ATM)                                                        |
|                                     | <i>ATR</i>       | ataxia telangiectasia and Rad3-related protein (ATR)                                       |
|                                     | <i>BRCA1</i>     | breast cancer 1, early onset (BRCA1)                                                       |
|                                     | <i>BRCA2</i>     | breast cancer 2, early onset (BRCA2)                                                       |
|                                     | <i>DDB1</i>      | damage-specific DNA binding protein 1 (DDB1)                                               |
|                                     | <i>DDB2</i>      | damage-specific DNA binding protein 2 (DDB2)                                               |
|                                     | <i>DDIT3</i>     | growth arrest and DNA damage-inducible protein (GADD153)                                   |

|                  |                                                            |
|------------------|------------------------------------------------------------|
| <i>ERCC1</i>     | excision repair cross-complementation group 1 (ERCC1)      |
| <i>ERCC4/XPF</i> | excision repair cross-complementation group 4 (XPF)        |
| <i>ERCC5/XPG</i> | excision repair cross-complementation group 5 (XPG)        |
| <i>GADD45A</i>   | growth arrest and DNA-damage-inducible, alpha<br>(GADD45A) |
| <i>LIG1</i>      | ligase I, DNA, ATP-dependent (LIG1)                        |
| <i>LIG3</i>      | ligase III, DNA, ATP-dependent (LIG3)                      |
| <i>MGMT</i>      | O-6-methylguanine-DNA methyltransferase (MGMT)             |
| <i>MLH1</i>      | mutL homolog 1 (MLH1)                                      |
| <i>MSH2</i>      | mutS homolog 2 (MSH2)                                      |
| <i>PARP1</i>     | Poly (ADP-ribose) polymerase 1 (PARP1)                     |
| <i>PCNA</i>      | proliferating cell nuclear antigen (PCNA)                  |
| <i>POLB</i>      | polymerase (DNA directed), beta (POLB)                     |
| <i>POLQ</i>      |                                                            |
| <i>RAD50</i>     | RAD50 homolog ( <i>S. cerevisiae</i> ) (RAD50)             |
| <i>RAD51</i>     | RAD51 recombinase (RAD51)                                  |
| <i>RRM2B</i>     | ribonucleotide reductase M2 B (TP53 inducible) (p53R2)     |
| <i>XPA</i>       | xeroderma pigmentosum, complementation group A (XPA)       |
| <i>XPC</i>       | xeroderma pigmentosum, complementation group C (XPC)       |

---
